# Supplementary material for: Design and synthesis of a multivalent fluorescent folate–calix[4]arene conjugate: cancer cell penetration and intracellular localization
Source: Royal Society of Chemistry journal article supplement (doi:10.1039/c4ob02333a), 2015-01-01
Supplement: c4ob02333a1.pdf [file c4ob02333a1.pdf]

## Targeting Cancer Cells with a Multivalent Fluorescent Folate–Calix[4]arene Conjugate: Design, Synthesis, Cell Penetration and Intracellular Localization

*Grazia Maria Letizia Consoli,\* Giuseppe Granata, Giorgia Fragassi, Mauro Grossi, Michele Sallese, \* Corrada Geraci*

### SUPPORTING INFORMATION

- Figure S1. <sup>1</sup>H NMR spectrum of compound **2**
- Figure S2. <sup>13</sup>C NMR spectrum of compound **2**
- Figure S3. <sup>1</sup>H NMR spectrum of compound **3**
- Figure S4. <sup>13</sup>C NMR spectrum of compound **3**
- Figure S5. <sup>1</sup>H NMR spectrum of compound **4**
- Figure S6. <sup>13</sup>C NMR spectrum of compound **4**
- Figure S7. <sup>1</sup>H NMR spectrum of compound **6**
- Figure S8. <sup>13</sup>C NMR spectrum of compound **6**
- Figure S9. <sup>1</sup>H NMR spectrum of compound **7**
- Figure S10. <sup>13</sup>C NMR spectrum of compound **7**
- Figure S11. <sup>1</sup>H NMR spectrum of compound **8**
- Figure S12. <sup>13</sup>C NMR spectrum of compound **8**
- Figure S13. <sup>1</sup>H NMR spectrum of compound **10**
- Figure S14. <sup>13</sup>C NMR spectrum of compound **10**
- Figure S15. Fluorescence spectrum of compound **7**
- Figure S16. DLS spectrum of compound **10**

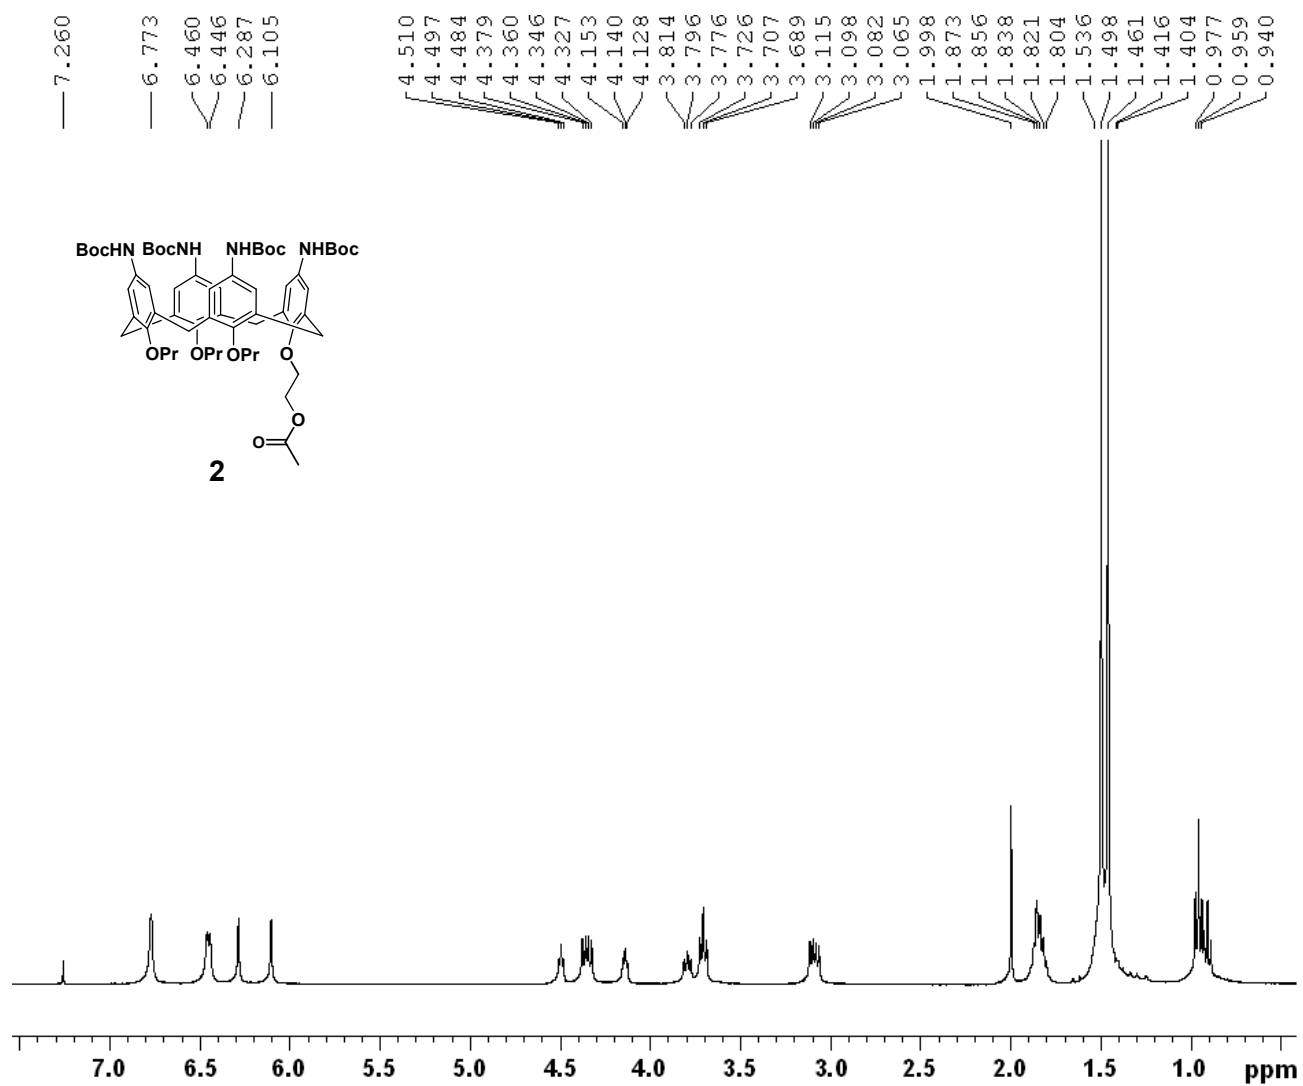

Figure 1S. <sup>1</sup>H NMR spectrum of compound 2.

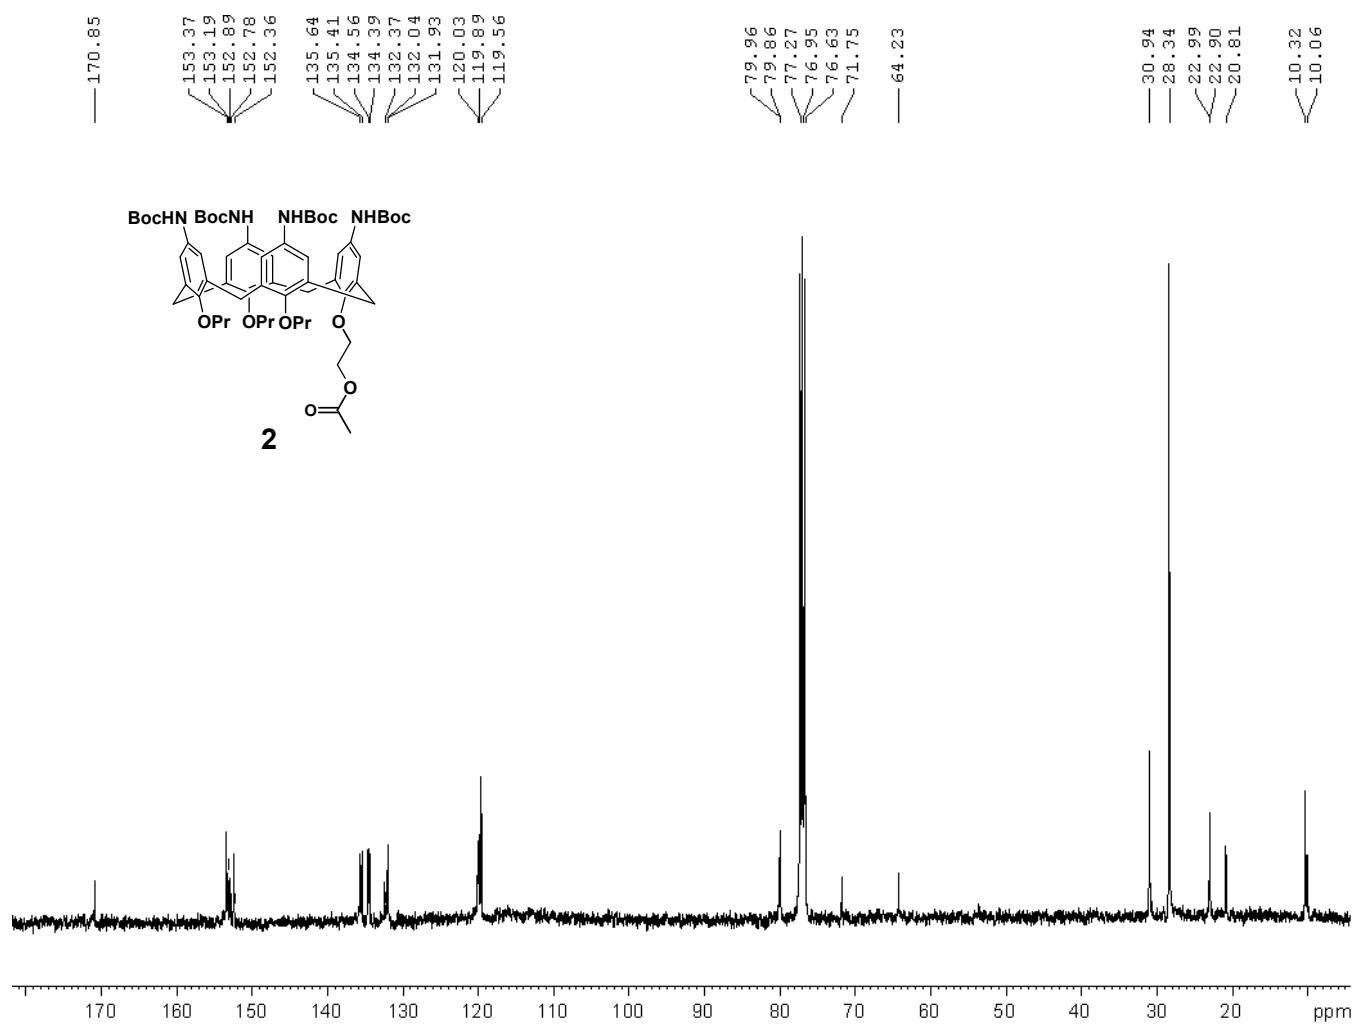

Figure 2S. <sup>13</sup>C NMR spectrum of compound 2.



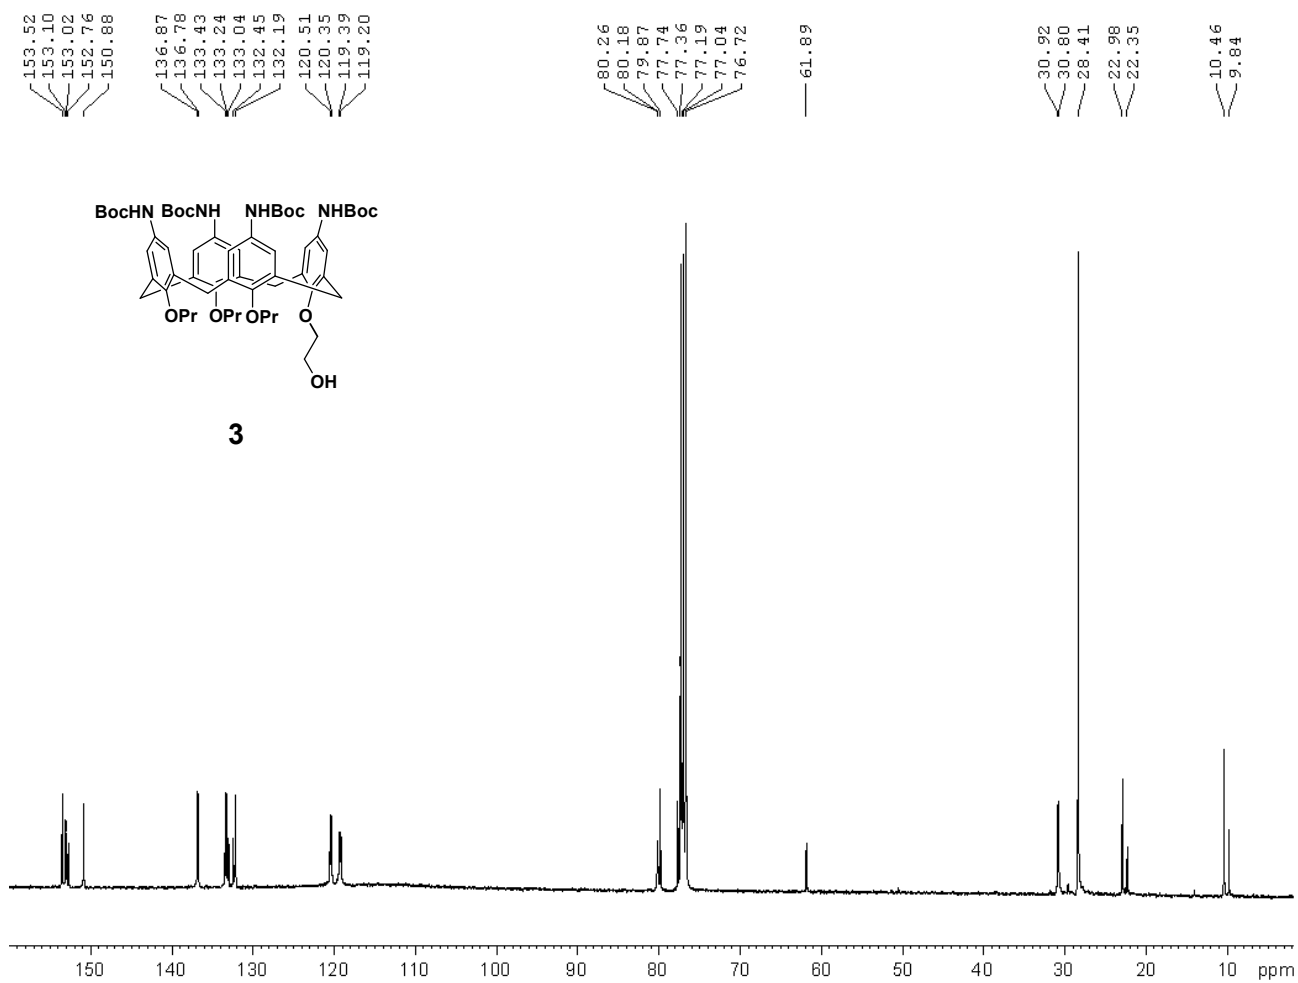

Figure 4S.  $^{13}\text{C}$  NMR spectrum of compound 3.

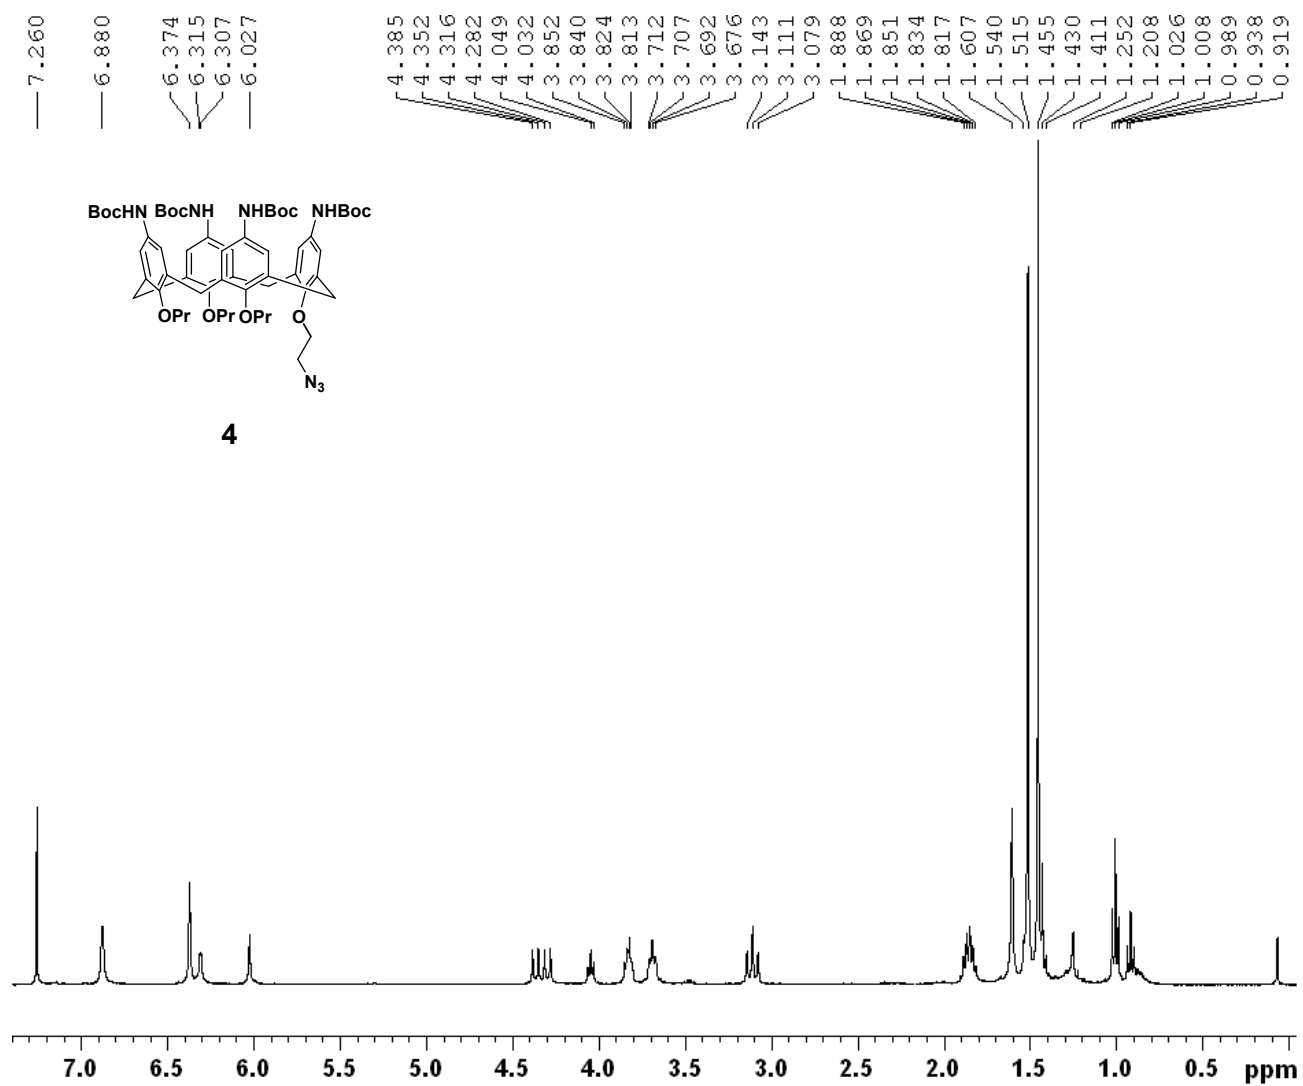

Figure 5S. <sup>1</sup>H NMR spectrum of compound 4.

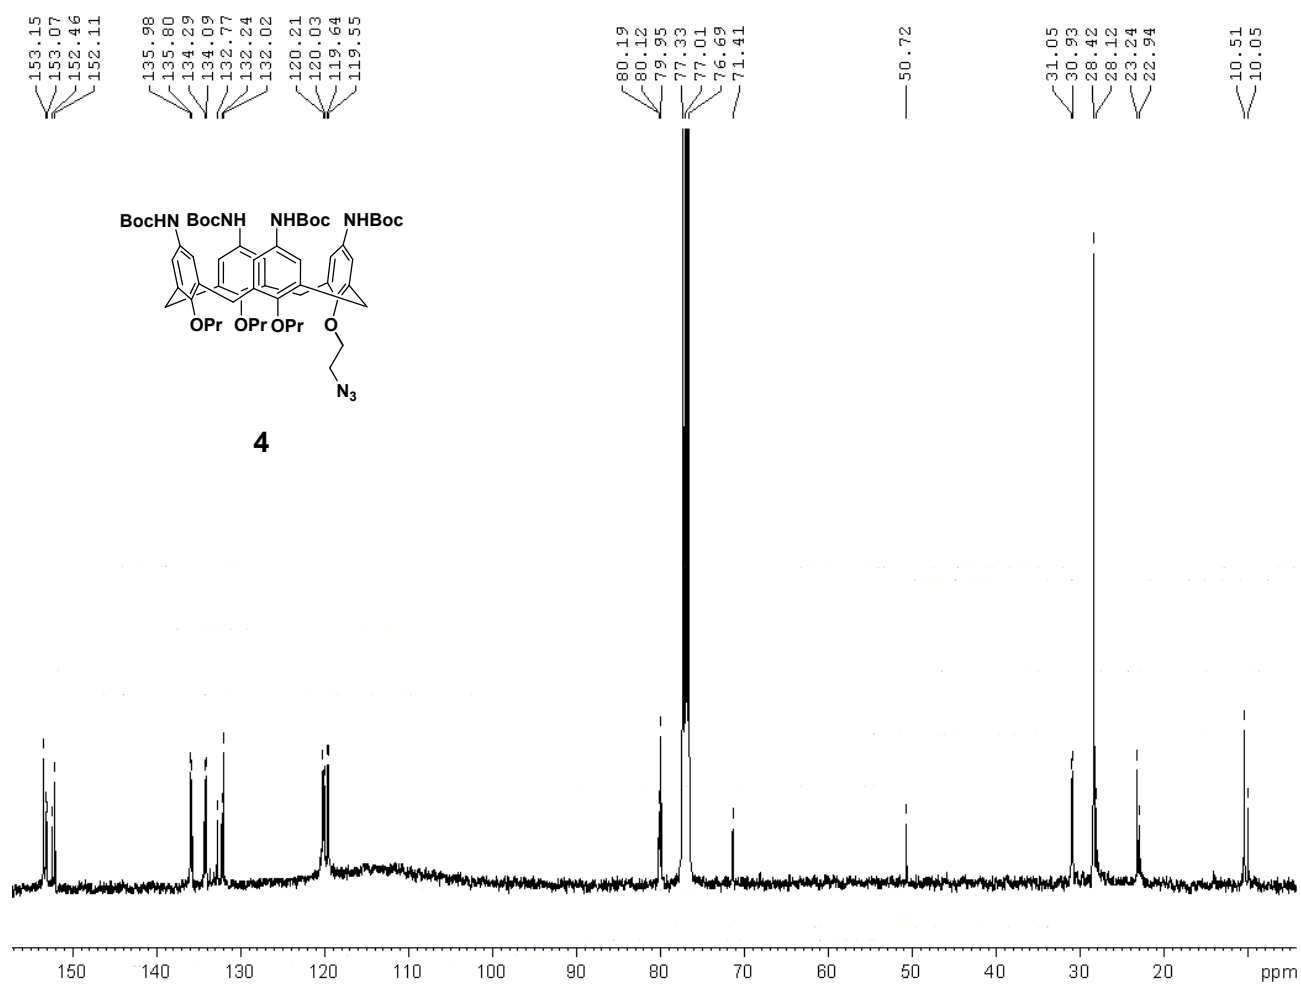

Figure 6S. <sup>13</sup>C NMR spectrum of compound 4.

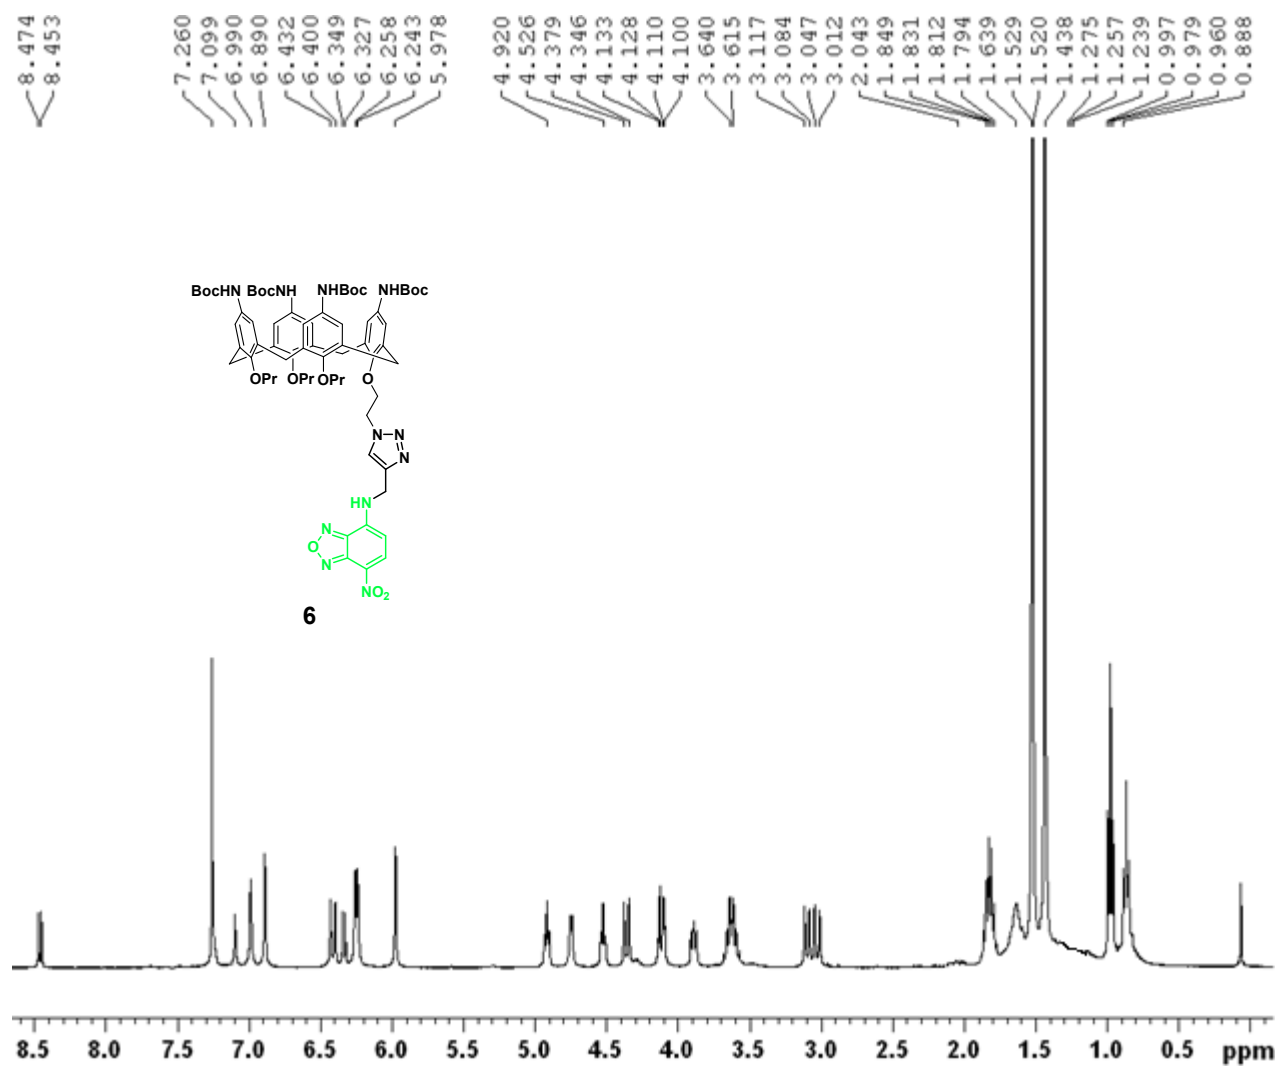

Figure 7S. <sup>1</sup>H NMR spectrum of compound 6.



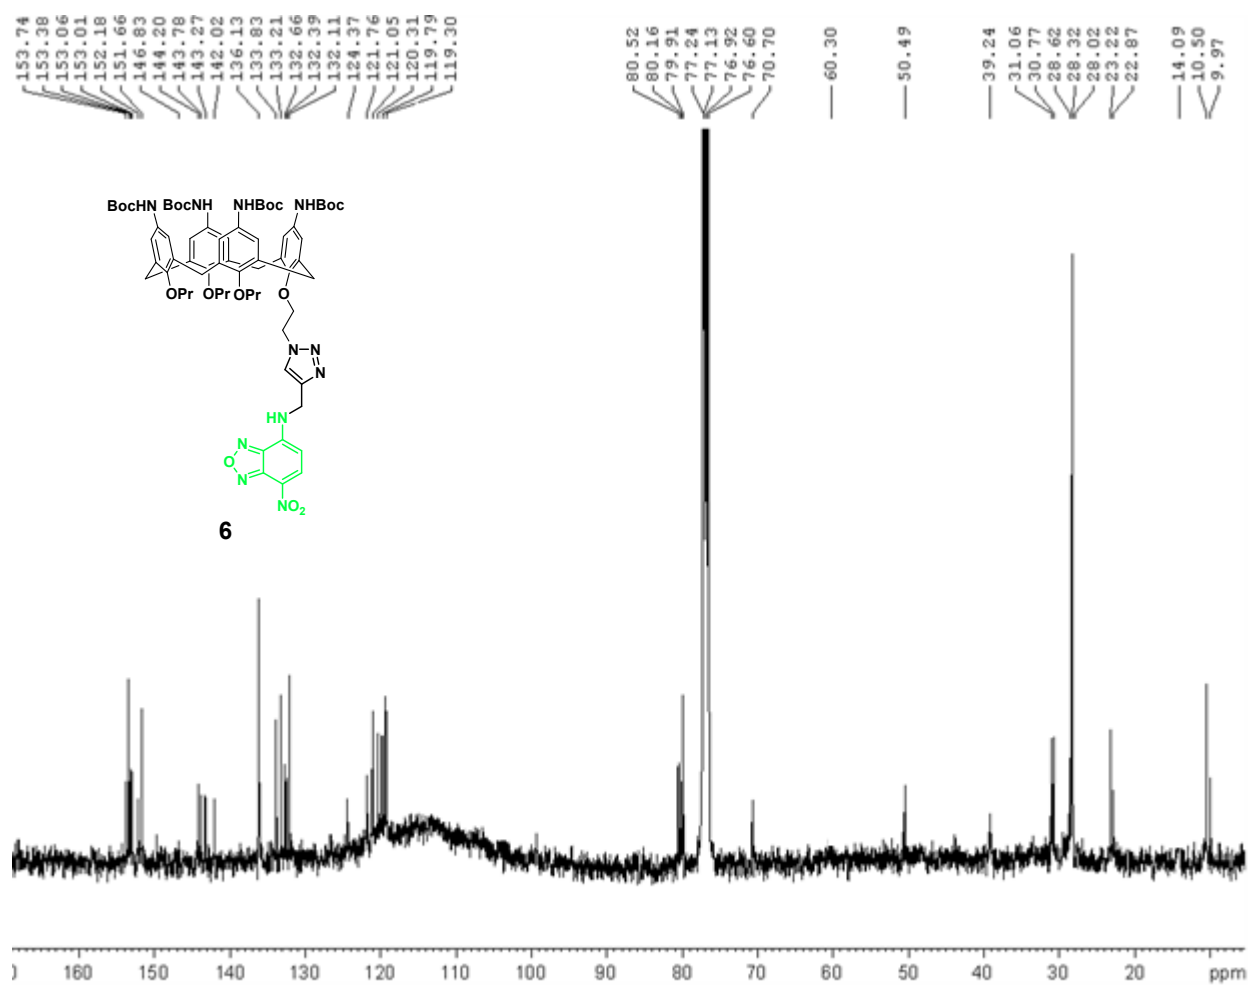

**Figure 8S.**  $^{13}\text{C}$  NMR spectrum of compound 6.

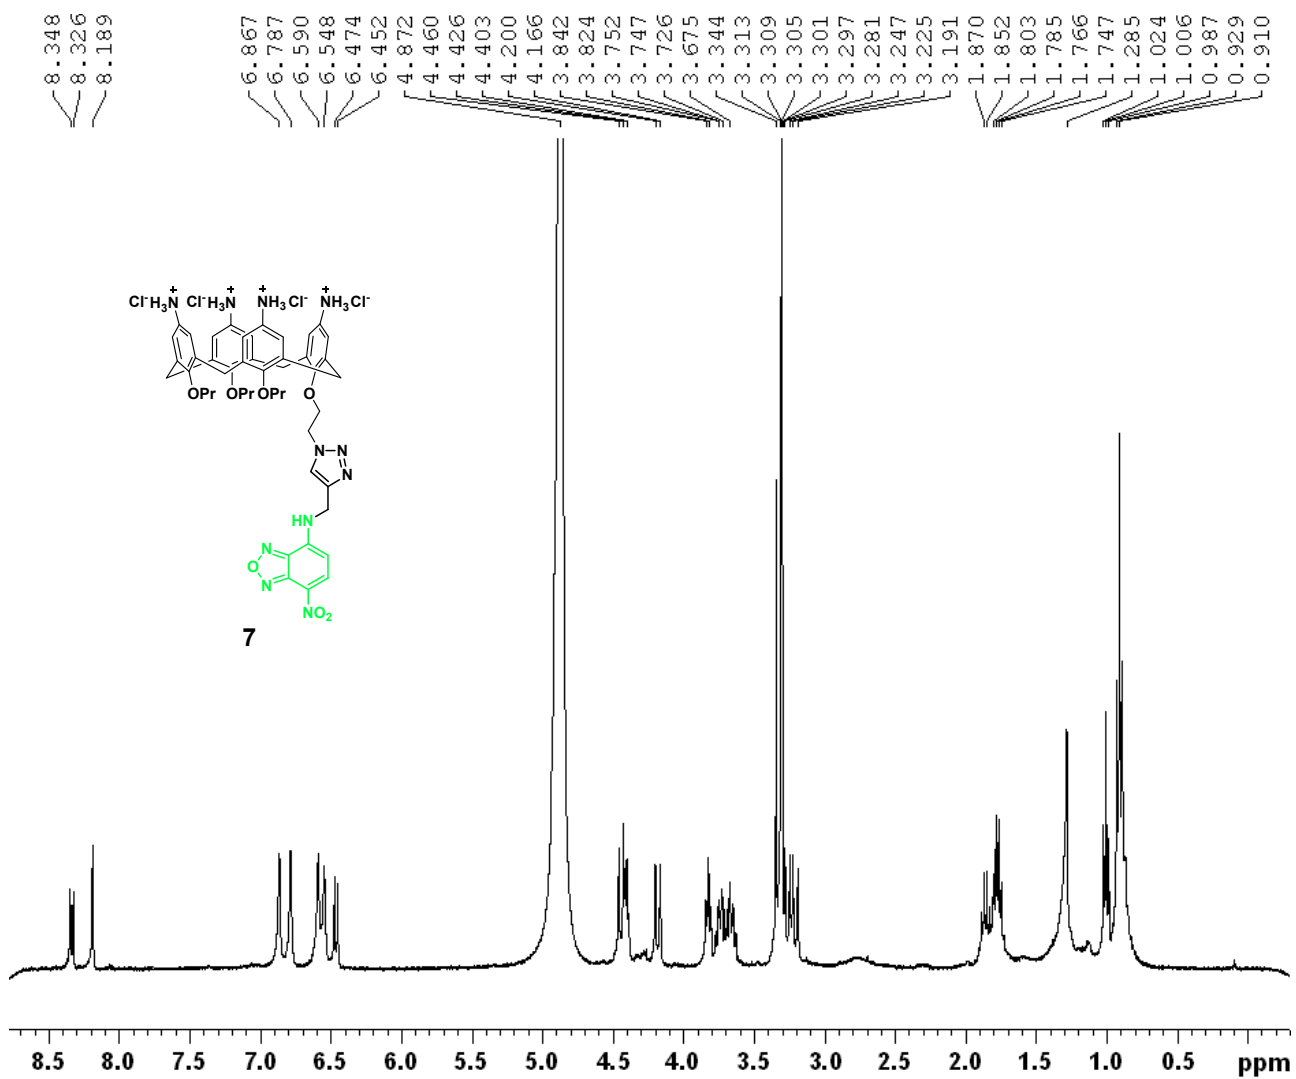

Figure 9S. <sup>1</sup>H NMR spectrum of compound 7.

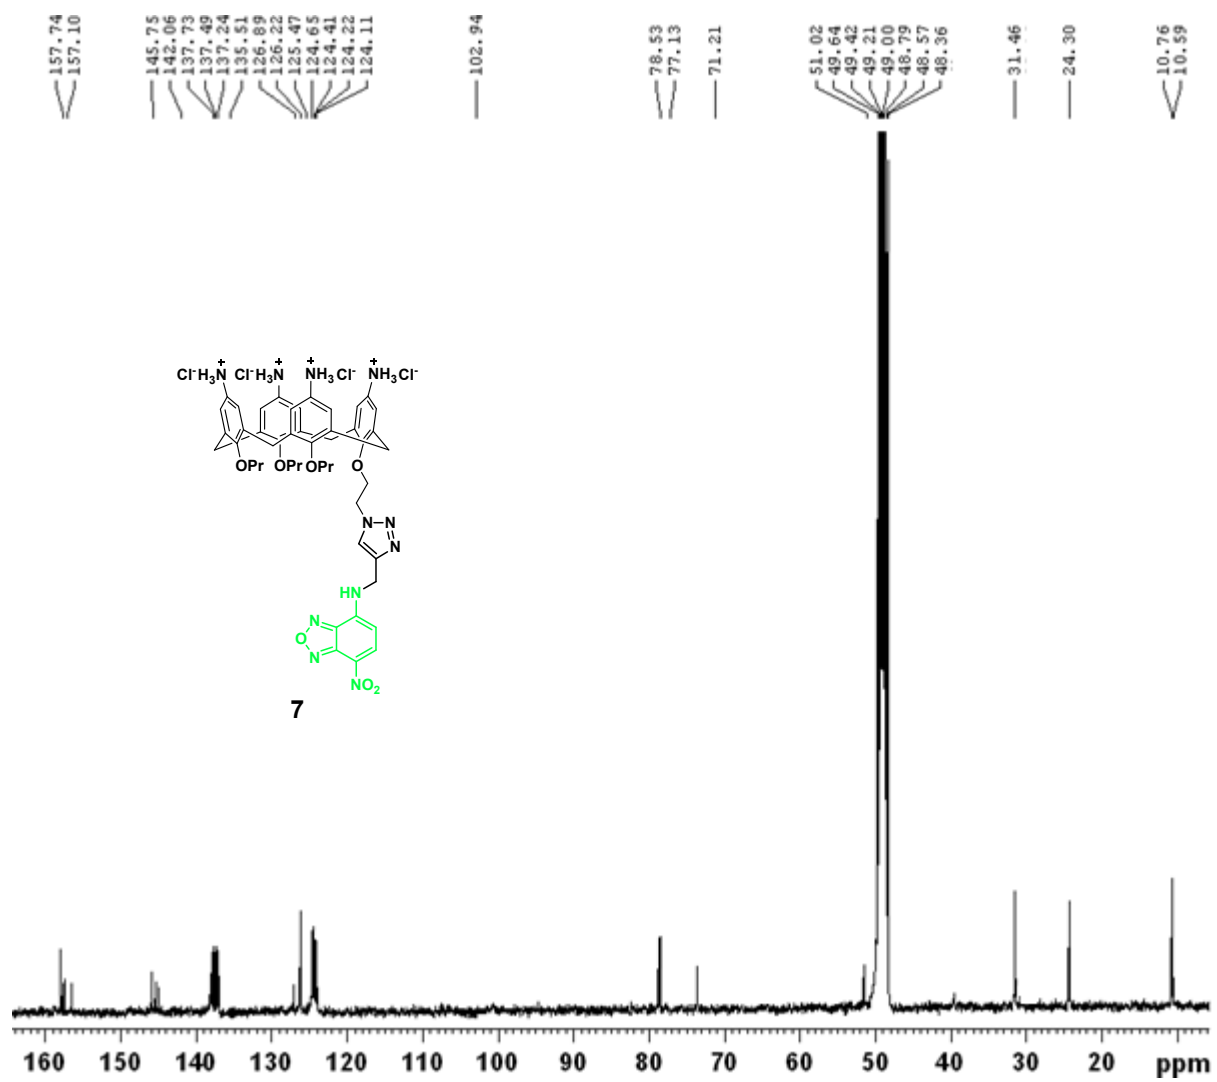

Figure 10S. <sup>13</sup>C NMR spectrum of compound 7.

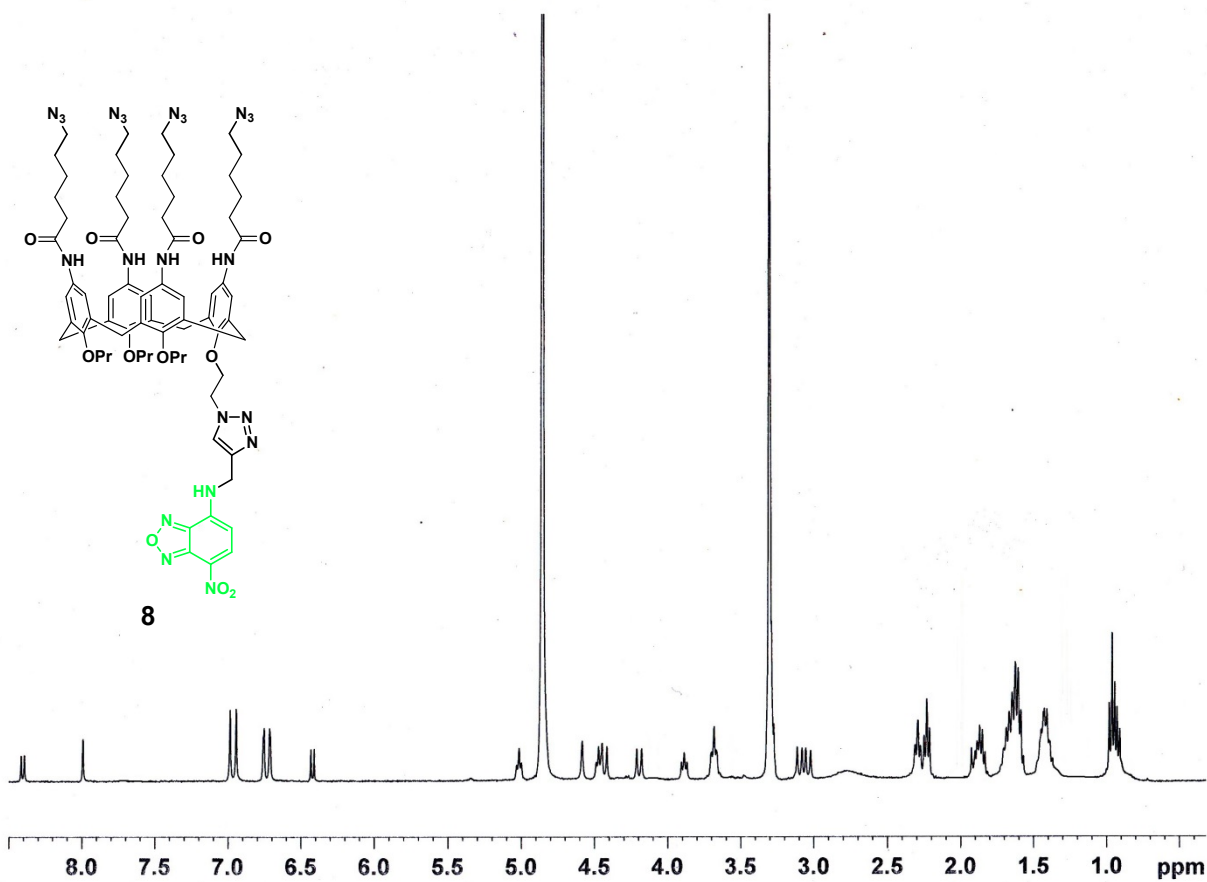

Figure 11S. <sup>1</sup>H NMR spectrum of compound 8.

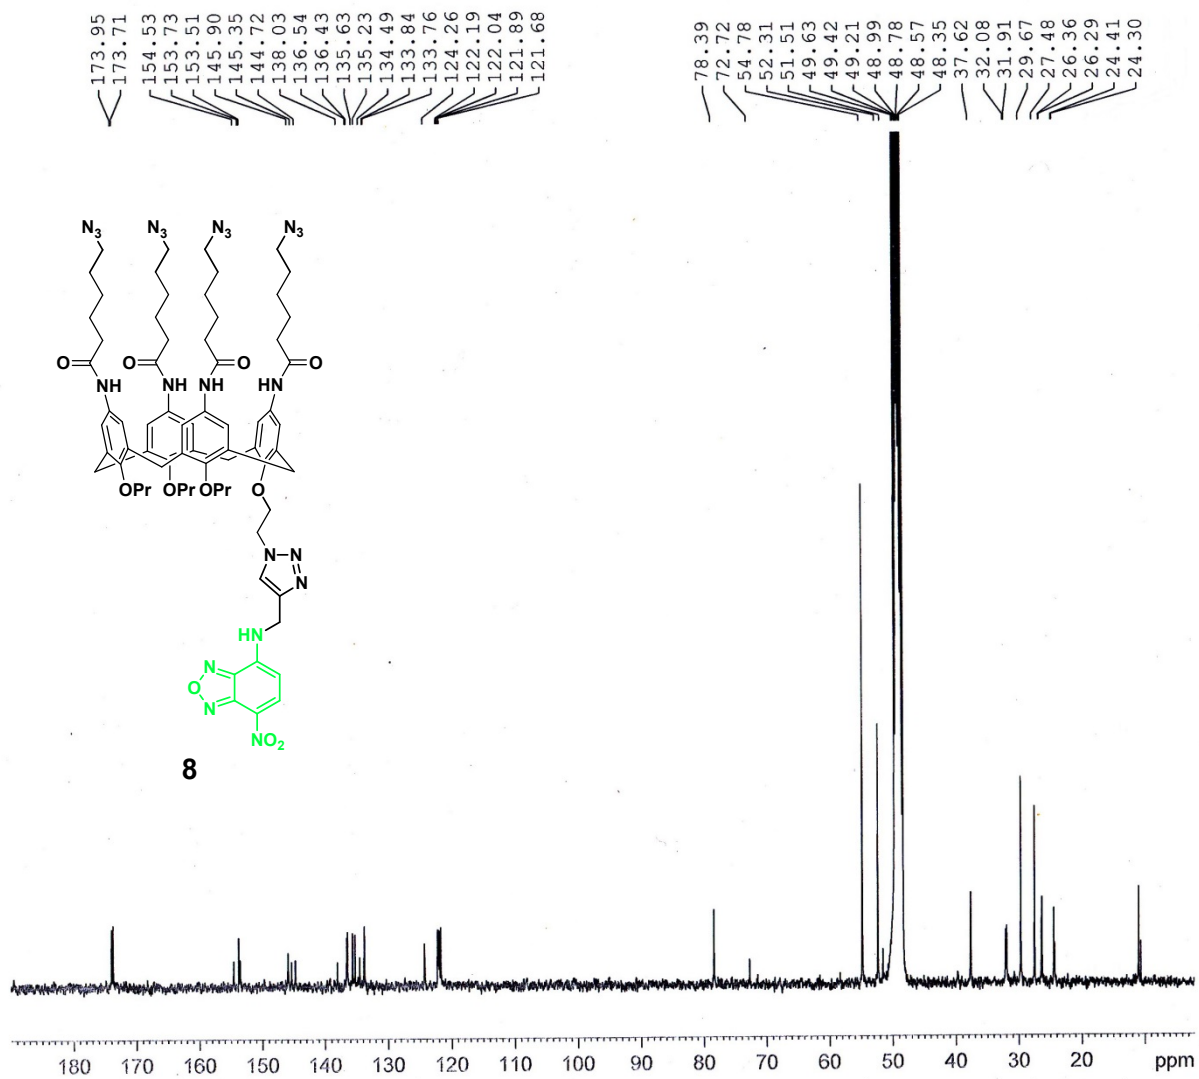

Figure 12S. <sup>13</sup>C NMR spectrum of compound 8.

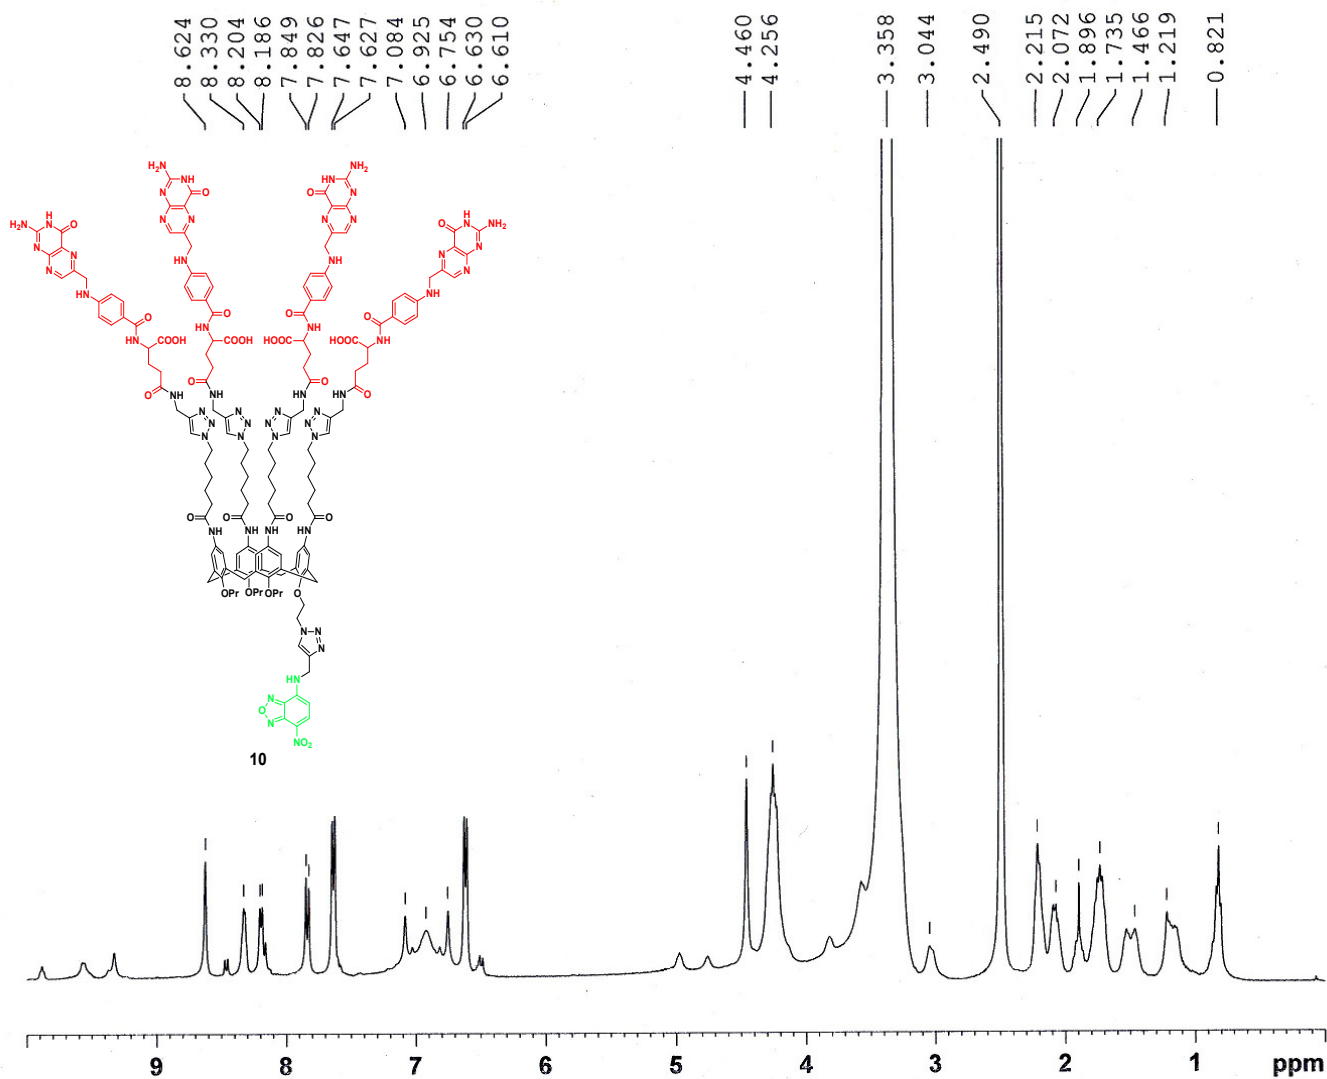

Figure 13S. <sup>1</sup>H NMR spectrum of compound 10.

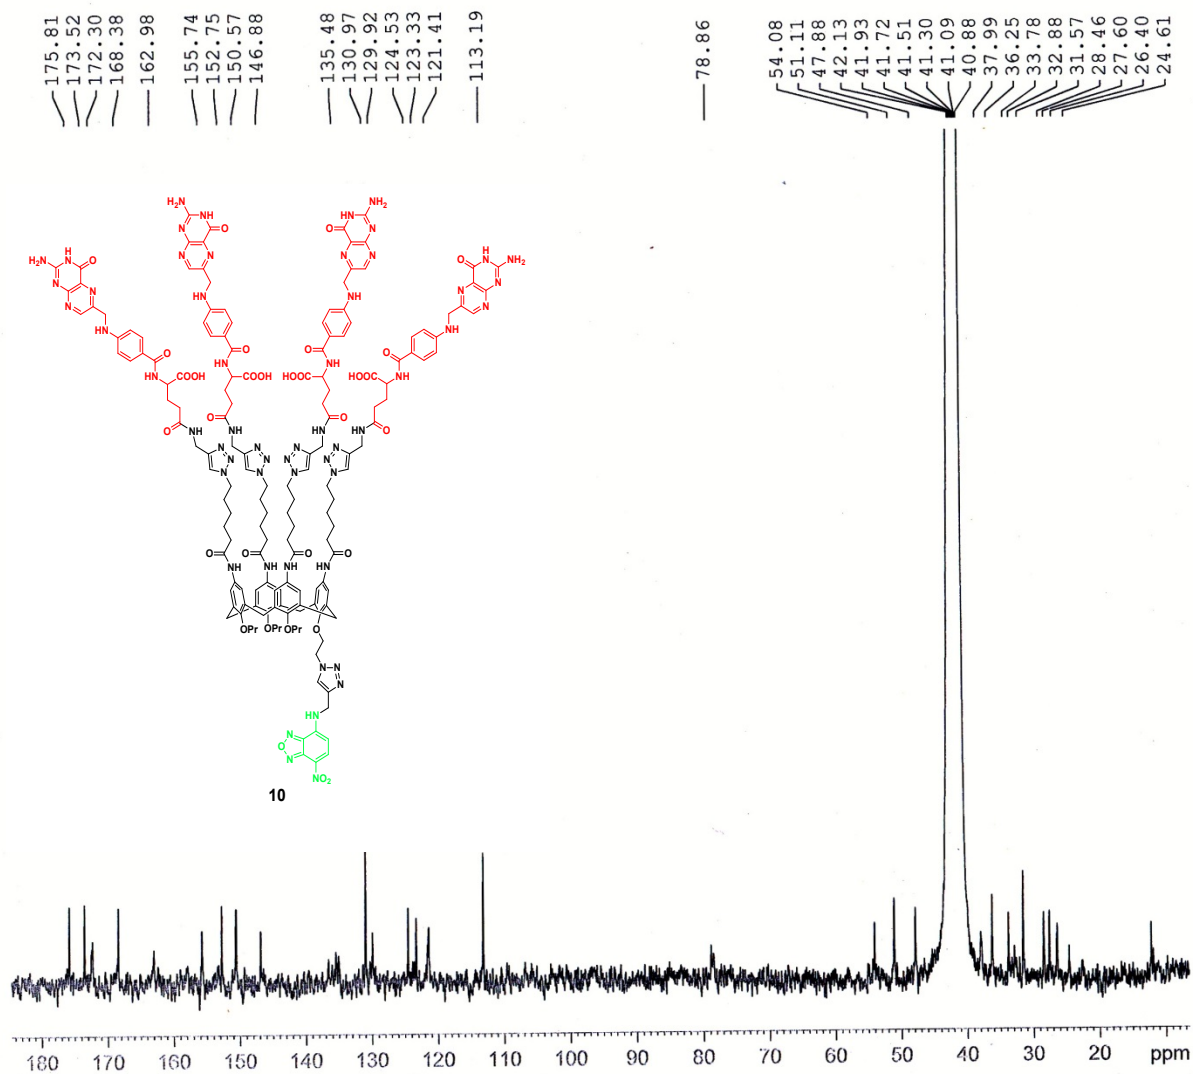

Figure 14S.  $^{13}\text{C}$  NMR spectrum of compound 10.

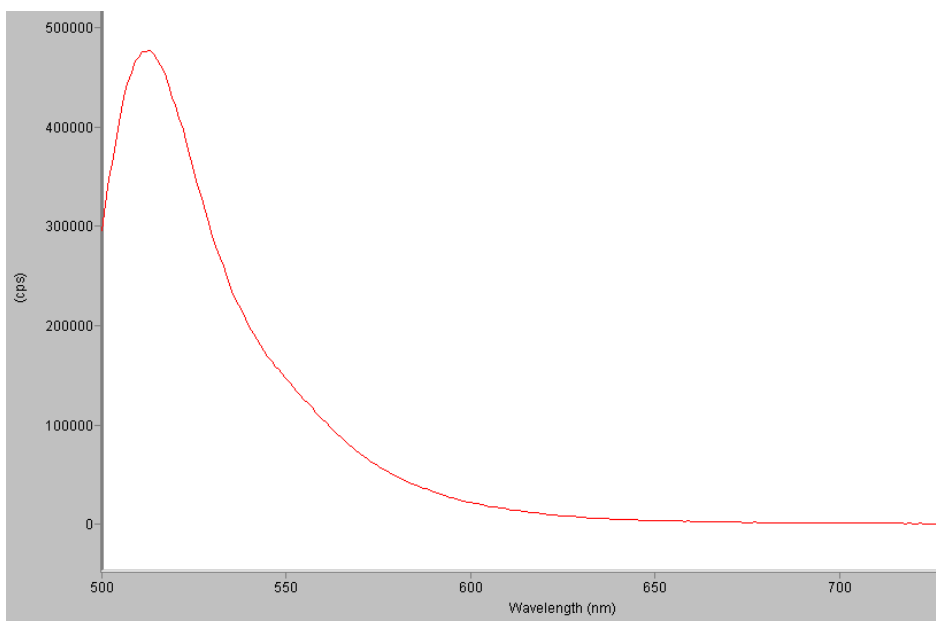

**Figure 15S.** Fluorescence excitation spectrum of compound **10** (H<sub>2</sub>O,  $\lambda_{\text{Exc}}$  488 nm,  $\lambda_{\text{Em}}$  516 nm).

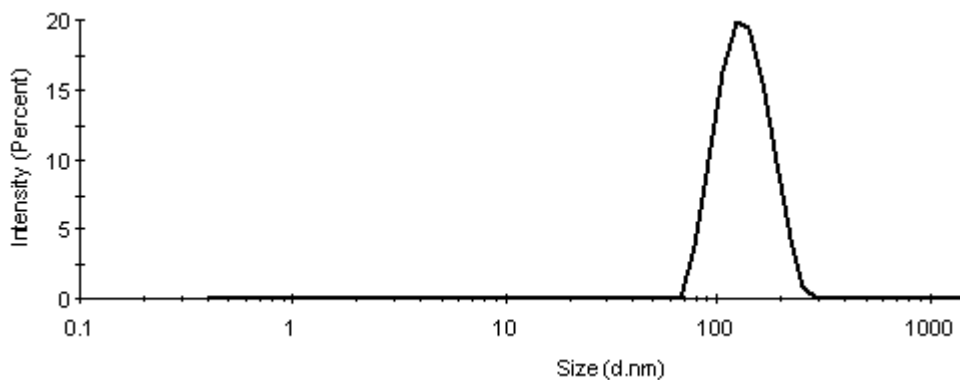

**Figure 16S.** Intensity (I)-weighted distribution of the hydrodynamic particle diameter  $D_H$  of the nanoaggregates of compound **10** (20  $\mu\text{M}$  concentration).
